# Supplementary material
Source: Research Square preprint supplement (doi:10.21203/rs.3.rs-8988548/v1)
Supplement: Supplementary file 1 [file d29e9ae0b5e13096fbb1530b.docx]

**Supplementary materials**

**Table S1.** PH (Proportional Hazards) Hypothesis testing (Schoenfeld test).

**Table S2.** Analysis of association rules for two disease combinations.

**Table S3**. Analysis of association rules for triple disease combinations.

**Table S4**. Fit index of potential category analysis model for multimorbidity pattern.

**Table S5.** Chronic disease descriptions of four latent class analysis models.

**Table S6.** Relationship between memeory scores, executive scores, total cognition scores, total cognition tertile and mumber of chronic diseases.

**Table S7.** Sensitivity analysis: the relationship between cognitive function and multimorbidity.

**Table S8.** Sensitivity analysis: the original COX analysis results and the sensitive COX analysis results.

**Method S1:** Cognitive function assessment.

**Figure legends and description.**

| **Table S1** **PH (Proportional Hazards) Hypothesis testing (Schoenfeld test)** | | | | | | | | | | | | |
| --- | --- | --- | --- | --- | --- | --- | --- | --- | --- | --- | --- | --- |
|  | Memeory scores | | | Executive scores | | | Total cognition scores | | | Total cognition tertile | | |
|  | chisq | df | p | chisq | df | p | chisq | df | p | chisq | df | p |
| Age | 0.0002 | 1 | 0.990 | 0.0002 | 1 | 0.988 | 0.0002 | 1 | 0.988 | 0.0001 | 1 | 0.994 |
| BMI | 0.016 | 1 | 0.899 | 0.016 | 1 | 0.899 | 0.015 | 1 | 0.901 | 0.015 | 1 | 0.902 |
| Smoking status | 0.677 | 1 | 0.411 | 0.663 | 1 | 0.415 | 0.661 | 1 | 0.416 | 0.691 | 1 | 0.406 |
| Drinking status | 3.678 | 1 | 0.055 | 3.621 | 1 | 0.057 | 3.681 | 1 | 0.055 | 3.689 | 1 | 0.055 |
| Education level | 1.556 | 3 | 0.669 | 0.537 | 1 | 0.464 | 1.514 | 3 | 0.679 | 1.542 | 3 | 0.673 |
| Gender | 2.133 | 1 | 0.144 | 2.030 | 1 | 0.154 | 2.047 | 1 | 0.152 | 2.139 | 1 | 0.144 |
| Marital status | 3.647 | 1 | 0.056 | 3.562 | 1 | 0.059 | 3.591 | 1 | 0.058 | 3.661 | 1 | 0.056 |
| Waist | 0.441 | 1 | 0.506 | 0.471 | 1 | 0.493 | 0.461 | 1 | 0.497 | 0.462 | 1 | 0.497 |
| Residence | 2.420 | 1 | 0.120 | 2.574 | 1 | 0.109 | 2.528 | 1 | 0.112 | 2.460 | 1 | 0.117 |
| GLOBAL | 15.920 | 13 | 0.253 | 15.629 | 13 | 0.270 | 15.838 | 13 | 0.258 | 16.121 | 14 | 0.306 |

Note. BMI=Body Mass Index.

| **Table S2.Analysis of association rules for two disease combinations.** | | | | | |
| --- | --- | --- | --- | --- | --- |
| Antecedent | Consequent | Support Count | Support Percent | Confidence Percent | Lift |
| hibpe | arthre | 847 | 17.23 | 43.77 | 1.02 |
| arthre | hibpe | 847 | 17.23 | 40.16 | 1.02 |
| digeste | arthre | 738 | 15.01 | 50.65 | 1.18 |
| dyslipe | hibpe | 694 | 14.11 | 57.64 | 1.46 |
| dyslipe | arthre | 533 | 10.84 | 44.27 | 1.03 |

Note. Table S2 displays all two-disease combinations with support >10% and confidence >40%.

**Hibpe**=hypertension, **Arthre**=Arthritis or rheumatism, **Digeste**=Diseases of the stomach or digestive system (excluding tumors or cancers), **Dyslipe**=Dyslipidemia (high or low lipids).

| **Table S3.Analysis of association rules for triple disease combinations.** | | | | | |
| --- | --- | --- | --- | --- | --- |
| Antecedent | Consequent | Support Count | Support Percent | Confidence Percent | Lift |
| hibpe,dyslipe | arthre | 318 | 6.47 | 45.82 | 1.07 |
| arthre,dyslipe | hibpe | 318 | 6.47 | 59.66 | 1.52 |
| hibpe,digeste | arthre | 282 | 5.74 | 51.84 | 1.21 |

Note. Table S3 displays all three-disease combinations with support >5% and confidence >40%.

**Hibpe**=hypertension, **Arthre**=Arthritis or rheumatism, **Digeste**=Diseases of the stomach or digestive system (excluding tumors or cancers), **Dyslipe**=Dyslipidemia (high or low lipids).

| **Table S4. Fit index of potential category analysis model for multimorbidity pattern** | | | | | | |
| --- | --- | --- | --- | --- | --- | --- |
| Category | AIC | BIC | aBIC | Entropy | BLRT | Class probability |
| 1 | 49628.666 | 49713.172 | 49671.863 | — | — | 100% |
| 2 | 48539.797 | 48715.309 | 48629.513 | 0.564 | <0.000 | 73%/27% |
| 3 | 48148.012 | 48414.531 | 48284.247 | 0.659 | <0.000 | 20.4%/9.9%/69.7% |
| 4 | 48032.488 | 48390.013 | 48215.242 | 0.664 | <0.000 | 6.7%/10.6%/63.9%/18.8% |
| 5 | 47959.635 | 48408.166 | 48188.909 | 0.582 | <0.000 | 50.5%/3.9%/2.4%/20.5%/22.6% |
| 6 | 47924.861 | 48464.399 | 48200.654 | 0.640 | <0.000 | 17.9%/3.7%/13.3%/2.3%/47.8%/14.9% |
| 7 | 47917.571 | 48548.115 | 48239.883 | 0.615 | <0.000 | 2%/46.4%/1.7%/3.2%/17.1%/12.5%/17.2% |
| 8 | 47899.870 | 48621.421 | 48268.702 | 0.610 | <0.000 | 22.8%/10.4%/8.5%/4.3%/1.1%/11.1%/3.5%/38.4% |

Note. AIC=Akaike information criterion, BIC=Bayesian Information Criterion, aBIC=Sample-Size Adjusted BIC, BLRT=Parametric Bootstrapped Likelihood Ratio Test,

| **Table S5.Chronic disease descriptions of four latent class analysis models.** | | | | | |
| --- | --- | --- | --- | --- | --- |
| Class | Class 1 | Class 2 | Class 3 | Class 4 | Overall |
| Total, N | 255 | 486 | 3358 | 818 | 4917 |
| Hibpe, [N(%)] | 173 (67.84%) | 127 (26.13%) | 986 (29.36%) | 649 (79.34%) | 1935 (39.35%) |
| Diabe, [N(%)] | 92 (36.08%) | 6 (1.23%) | 217 (6.46%) | 334 (40.83%) | 649 (13.2%) |
| Cancre, [N(%)] | 15 (5.88%) | 14 (2.88%) | 75 (2.23%) | 25 (3.06%) | 129 (2.62%) |
| lunge, [N(%)] | 197 (77.25%) | 453 (93.21%) | 0 (0%) | 66 (8.07%) | 716 (14.56%) |
| Hearte, [N(%)] | 154 (60.39%) | 71 (14.61%) | 317 (9.44%) | 284 (34.72%) | 826 (16.8%) |
| Stroke, [N(%)] | 73 (28.63%) | 0 (0%) | 119 (3.54%) | 153 (18.7%) | 345 (7.02%) |
| Psyche, [N(%)] | 41 (16.08%) | 16 (3.29%) | 62 (1.85%) | 14 (1.71%) | 133 (2.7%) |
| Arthre, [N(%)] | 197 (77.25%) | 228 (46.91%) | 1359 (40.47%) | 325 (39.73%) | 2109 (42.89%) |
| Dyslipe, [N(%)] | 145 (56.86%) | 28 (5.76%) | 268 (7.98%) | 763 (93.28%) | 1204 (24.49%) |
| Livere, [N(%)] | 74 (29.02%) | 41 (8.44%) | 187 (5.57%) | 61 (7.46%) | 363 (7.38%) |
| Kidneye,[N(%)] | 108 (42.35%) | 37 (7.61%) | 285 (8.49%) | 56 (6.85%) | 486 (9.88%) |
| Digeste, [N(%)] | 163 (63.92%) | 161 (33.13%) | 894 (26.62%) | 239 (29.22%) | 1457 (29.63%) |
| Asthmae, [N(%)] | 88 (34.51%) | 122 (25.1%) | 0 (0%) | 10 (1.22%) | 220 (4.47%) |

**Note.** Class 1: Complex systemic disease pattern; Class 2: Respiratory System - Arthritis Pattern; Class 3: Mild joint-digestive disorder pattern; Class 4: Vascular metabolic disease pattern.

**Hibpe**=hypertension, **Diabe**=Diabetes or elevated blood sugar (including impaired glucose tolerance and elevated fasting blood sugar), **Cancre**=Malignant tumors such as cancer (excluding mild skin cancer), **Lunge**=Chronic lung diseases such as chronic bronchitis or emphysema, pulmonary heart disease (excluding tumors or cancers), **Hearte**=Heart disease (such as myocardial infarction, coronary heart disease, angina, congestive heart failure, and other heart diseases), **Stroke**=stroke, **Psyche** = Psychiatric disorders, **Arthre**=Arthritis or rheumatism, **Dyslipe**=Dyslipidemia (high or low lipids), **Livere**=Liver disease (other than fatty liver, tumor or cancer), **Kidneye**=Kidney disease (excluding tumors or cancers), **Digeste**=Diseases of the stomach or digestive system (excluding tumors or cancers), **Asthmae**=Asthma (non-lung disease).

| **Table S6. Relationship between memeory scores, executive scores, total cognition scores, total cognition tertile and number of chronic diseases.** | | | | | | | | | | |
| --- | --- | --- | --- | --- | --- | --- | --- | --- | --- | --- |
| Characteristic | The number of Chronic disease | | | | | | | | | |
| 0，N=681 | 1，N=1293 | 2，N=1183 | 3，N=868 | 4，N=471 | ≥5，N=421 | Overall，N=4917 | Statistic (X2) | *P* |
| Total cognition scores | 13 (10.5, 15) | 13 (10.5, 15) | 12.5 (9.5, 14.5) | 12.5 (10, 14.5) | 12.5 (9.5, 14.5) | 12.5 (9.5, 14) | 12.5 (10, 14.5) | 30.1 | <0.001 |
| Executive scores | 9 (7, 11) | 9 (7, 11) | 9 (7, 10) | 9 (7, 10) | 9 (6, 10) | 9 (6, 10) | 9 (7, 10) | 28.3 | <0.001 |
| Memeory scores | 4 (3, 5) | 4 (2.5, 5) | 3.5 (2.5, 4.5) | 3.5 (2.5, 4.5) | 4 (3, 5) | 3.5 (2.5, 4.5) | 4 (2.5, 5) | 19.5 | 0.002 |
| Total cognition tertile |  |  |  |  |  |  |  |  |  |
| <Q1 | 209 (30.7%) | 432 (33.4%) | 459 (38.8%) | 315 (36.3%) | 175 (37.2%) | 173 (41.1%) | 1763 (35.9%) | 31.6 | <0.001 |
| Q1-Q2 | 230 (33.8%) | 451 (34.9%) | 408 (34.5%) | 306 (35.3%) | 151 (32.1%) | 143 (34%) | 1689 (34.4%) |  |  |
| ≥Q2 | 242 (35.5%) | 410 (31.7%) | 316 (26.7%) | 247 (28.5%) | 145 (30.8%) | 105 (24.9%) | 1465 (29.8%) |  |  |

Note. Q1=11, Q2=14.

| **Table S7 Sensitivity analysis: the relationship between cognitive function and multimorbidity** | | | | | | | | |
| --- | --- | --- | --- | --- | --- | --- | --- | --- |
| Variable | Model 1 | | Model 2 | | Model 3 | | Model 4 | |
| HR(95%CI) | *P* | HR(95%CI) | *P* | HR(95%CI) | *P* | HR(95%CI) | *P* |
| Total cognition scores | 0.972(0.961,0.983) | <0.001 | 0.980(0.967,0.994) | 0.004 | 0.981(0.968,0.994) | 0.004 | 0.978(0.965,0.992) | 0.001 |
| Executive scores | 0.963(0.948,0.978) | <0.001 | 0.973(0.956,0.991) | 0.003 | 0.974(0.956,0.992) | 0.004 | 0.970(0.952,0.988) | 0.001 |
| Memeory scores | 0.965(0.942,0.988) | 0.003 | 0.982(0.957,1.008) | 0.166 | 0.982(0.957,1.007) | 0.158 | 0.981(0.956,1.006) | 0.139 |
| Total cognition tertile |  |  |  |  |  |  |  |  |
| <Q1 | 1.000(Reference) |  | 1.000(Reference) |  | 1.000(Reference) |  | 1.000(Reference) |  |
| Q1-Q2 | 0.876(0.796,0.962) | 0.006 | 0.912(0.825,1.008) | 0.071 | 0.914(0.827,1.010) | 0.078 | 0.901(0.814,0.996) | 0.041 |
| ≥Q2 | 0.789(0.714,0.872) | <0.001 | 0.845(0.753,0.948) | 0.004 | 0.847(0.755,0.950) | 0.005 | 0.832(0.741,0.933) | 0.002 |

Note. HR: Hazard Ratio, CI: Confidence Interval, BMI=Body Mass Index, Q1=11, Q2=14

Model 1:Crude Model: Unadjusted.

Model 2:Adjusted: Age, Gender, Education level, Marital status , Residence.

Model 3:Adjusted: Age, Gender, Education level, Marital status , Residence, Smoking status, Drinking status.

Model 4:Adjusted: Age, Gender, Education level, Marital status , Residence, Smoking status, Drinking status, BMI, Waist

| **Table S8 Sensitivity analysis: The original COX analysis results and the sensitive COX analysis results** | | | | | | | | | | | | |
| --- | --- | --- | --- | --- | --- | --- | --- | --- | --- | --- | --- | --- |
| Variable | Model 1 | | | Model 2 | | | Model 3 | | | Model 4 | | |
| Original_HR | Sensitivity_HR | CP | Original_HR | Sensitivity_HR | CP | Original_HR | Sensitivity_HR | CP | Original_HR | Sensitivity_HR | CP |
| Total cognition scores | 0.974 | 0.972 | 0.20% | 0.981 | 0.98 | 0.10% | 0.981 | 0.981 | 0.00% | 0.978 | 0.978 | 0.00% |
| Executive scores | 0.965 | 0.963 | 0.20% | 0.974 | 0.973 | 0.10% | 0.974 | 0.974 | 0.00% | 0.97 | 0.97 | 0.00% |
| Memeory scores | 0.966 | 0.965 | 0.10% | 0.981 | 0.982 | 0.10% | 0.981 | 0.982 | 0.10% | 0.98 | 0.981 | 0.10% |
| Total cognition tertile |  |  |  |  |  |  |  |  |  |  |  |  |
| <Q1 | 1.000 | 1.000 |  | 1.000 | 1.000 |  | 1.000 | 1.000 |  | 1.000 | 1.000 |  |
| Q1-Q2 | 0.919 | 0.876 | 4.70% | 0.953 | 0.912 | 4.30% | 0.955 | 0.914 | 4.30% | 0.939 | 0.901 | 4.00% |
| ≥Q2 | 0.805 | 0.789 | 2.00% | 0.854 | 0.845 | 1.10% | 0.855 | 0.847 | 0.90% | 0.839 | 0.832 | 0.80% |

Note. CP: Change_Percent, Q1=11, Q2=14. HR: Hazard Ratio

Model 1:Crude Model: Unadjusted.

Model 2:Adjusted: Age, Gender, Education level, Marital status , Residence.

Model 3:Adjusted: Age, Gender, Education level, Marital status , Residence, Smoking status, Drinking status.

Model 4:Adjusted: Age, Gender, Education level, Marital status , Residence, Smoking status, Drinking status, BMI, Waist

**Method S1: Cognitive function assessment**

DC001 What year is it this year? 1. Correct 2. Incorrect 997. Don't know 999. Refuse to answer

DC002 What season is it now? 1. Correct 2. Incorrect 997. Don't know 999. Refuse to answer

DC003 What is today's date in this month? [Note to interviewer: Lunar calendar dates are also correct. Respondents are not allowed to check their phones or calendars.] 1. Correct 2. Incorrect 997. Don't know 999. Refuse to answer

DC004 What day of the week is it today? 1. Correct 2. Incorrect 997. Don't know 999. Refuse to answer

DC005 What month is it now? [Note to interviewer: Lunar calendar months are also correct. Respondents are not allowed to check their phones or calendars.] 1. Correct 2. Incorrect 997. Don't know 999. Refuse to answer

【Introduction: Now I need you to listen carefully to what I say and then do as I instruct. Can you listen to me carefully now? Are you ready? Let's begin. Please calculate 100 minus 7, then subtract 7 from the resulting number, and continue this process. Please tell me the answer after each subtraction of 7 until I say "Stop". 】

【Interviewer's Note: After the instruction is read, during the calculation process, the respondent should not receive any further instructions from the interviewer, nor should the interviewer remind the respondent of what to do. Remember not to give any additional hints. Just say "Continue"; if the respondent does not give a positive response and the interviewer reminds "Continue" three times, if the respondent still doesn't know what to do, you can choose the "Don't Know" option; this test allows the respondent to use paper and pen to assist in the calculation. 】

DC007_1 Record answer: 1. Record answer 997. Don't know 999. Refuse to answer

DC007_2 Record answer: 1. Record answer 997. Don't know 999. Refuse to answer

DC007_3 Record answer: 1. Record answer 997. Don't know 999. Refuse to answer

DC007_4 Record answer: 1. Record answer 997. Don't know 999. Refuse to answer

DC007_5 Record answer: 1. Record answer 997. Don't know 999. Refuse to answer

Here is a picture. Please draw it here exactly as shown in the picture. Click on the blank box below to take a photo of the drawing made by the respondent and upload it to the survey system for retention. [Surveyor's note: If the shape copied by the respondent meets A) a five-sided figure with two intersecting sides, and B) all the angles within the five sides are complete, it will be considered correct.]

DC009 Record of Answers: 1. Correct 2. Incorrect 3. Not Evaluated 997. Do not know 999. Refused to answer (The respondent was unable to complete due to objective physical reasons)

DC010 Next, I will read ten words to you. Please follow me and read these ten words aloud one by one. Then I will ask you to recall these ten words. Do you understand? [Interviewer's note: Please check if the interviewee understands how to complete this test. Read the words slowly and steadily to the interviewee, and have the interviewee repeat after you. The frequency should be about one word every two seconds. Only when the interviewee has a hearing impairment can you show the word list and read the words at the same time. Before moving on to the next set of words, you should read aloud and have the interviewee repeat the word.]

1. Yes 2. No

DC011 Interviewer's observation: Please record the reasons why the interviewee was unable to complete this test? (Multiple choices are allowed) 1. Refused or unwilling to take this test 2. Unable to speak throughout one's life 3. Unable to speak after entering the elderly stage 4. Deaf or having poor hearing 5. Others, please specify

DC012 Now please tell me the words you can recall.

**Figure legends and description**

**Table 1. Baseline analysis of the participants involved in the study (n=4917)**

Note. BMI=Body Mass Index

Data are presented as median (interquartile range) for continuous variables and number (percentage) for categorical variables.

P-values were calculated using the Mann-Whitney U test for continuous variables and Chi-square test for categorical variables.

**Table2. The relationship between cognitive function and multimorbidity.**

Note. HR: Hazard Ratio, CI: Confidence Interval, BMI=Body Mass Index, Q1=11, Q2=14

Model 1:Crude Model: Unadjusted.

Model 2:Adjusted: Age, Gender, Education level, Marital status , Residence.

Model 3:Adjusted: Age, Gender, Education level, Marital status , Residence, Smoking status, Drinking status.

Model 4:Adjusted: Age, Gender, Education level, Marital status , Residence, Smoking status, Drinking status, BMI, Waist

**Table 3. Multivariate multiclass logistic regression analysis of the impact of cognitive function on different multimorbidity patterns**

Note. HR: Hazard Ratio, CI: Confidence Interval, BMI=Body Mass Index, Q1=11, Q2=14.

Reference group: The healthy pattern (N=618).

Class 1: Complex systemic disease pattern; Class 2: Respiratory System - Arthritis Pattern; Class 3: Mild joint-digestive disorder pattern; Class 4: Vascular metabolic disease pattern

**Figure 1. Study design**

**Figure 2. Restricted cubic spline analysis of the association between cognitive function and multimorbidity risk.**
Note. (A) Total cognitive function score.(B) Memory function score.(C) Mental status score.

**Figure 3. Trends in prevalence of 13 chronic diseases across five waves of follow-up.**

Note. **Hibpe**=hypertension, **Diabe**=Diabetes or elevated blood sugar (including impaired glucose tolerance and elevated fasting blood sugar), **Cancre**=Malignant tumors such as cancer (excluding mild skin cancer), **Lunge**=Chronic lung diseases such as chronic bronchitis or emphysema, pulmonary heart disease (excluding tumors or cancers), **Hearte**=Heart disease (such as myocardial infarction, coronary heart disease, angina, congestive heart failure, and other heart diseases), **Stroke**=stroke, **Psyche** = Psychiatric disorders, **Arthre**=Arthritis or rheumatism, **Dyslipe**=Dyslipidemia (high or low lipids), **Livere**=Liver disease (other than fatty liver, tumor or cancer), **Kidneye**=Kidney disease (excluding tumors or cancers), **Digeste**=Diseases of the stomach or digestive system (excluding tumors or cancers), **Asthmae**=Asthma (non-lung disease).

**Figure 4. Four-class multimorbidity patterns identified by latent class analysis.**

Note. Class 1: Complex systemic disease pattern; Class 2: Respiratory System - Arthritis Pattern; Class 3: Mild joint-digestive disorder pattern; Class 4: Vascular metabolic disease pattern

**Hibpe**=hypertension, **Diabe**=Diabetes or elevated blood sugar (including impaired glucose tolerance and elevated fasting blood sugar), **Cancre**=Malignant tumors such as cancer (excluding mild skin cancer), **Lunge**=Chronic lung diseases such as chronic bronchitis or emphysema, pulmonary heart disease (excluding tumors or cancers), **Hearte**=Heart disease (such as myocardial infarction, coronary heart disease, angina, congestive heart failure, and other heart diseases), **Stroke**=stroke, **Psyche** = Psychiatric disorders, **Arthre**=Arthritis or rheumatism, **Dyslipe**=Dyslipidemia (high or low lipids), **Livere**=Liver disease (other than fatty liver, tumor or cancer), **Kidneye**=Kidney disease (excluding tumors or cancers), **Digeste**=Diseases of the stomach or digestive system (excluding tumors or cancers), **Asthmae**=Asthma (non-lung disease).
